# Supplementary material for: Regulation of lymphoma in vitro by CLP36 through the PI3K/AKT/CREB signaling pathway
Source: PeerJ. 2024 Dec 24;12:e18693. doi: 10.7717/peerj.18693 (PMC11674146; doi:10.7717/peerj.18693)
Supplement: Supplemental Information 2 [file peerj-12-18693-s002.xls]

## Sheet: Sheet1
ITEM TO CHECK	IMPORTANCE	CHECKLIST
EXPERIMENTAL DESIGN
Definition of experimental and control groups	E	Page5line97-100
Number within each group	E	Page5line97-100
Assay carried out by core lab or investigator's lab?	D	Not Applicable
Acknowledgement of authors' contributions	D	Not Applicable
SAMPLE
Description	E	Page6line146
Volume/mass of sample processed	D	Not Applicable
Microdissection or macrodissection	E	Page6line147-149
Processing procedure	E	Page6-7line147-154
If frozen - how and how quickly?	E	Page6-7line147-154
If fixed - with what, how quickly?	E	Page6-7line147-154
Sample storage conditions and duration (especially for FFPE samples)	E	Page6-7line147-154
NUCLEIC ACID EXTRACTION
Procedure and/or instrumentation	E	Page6-7line147-154
Name of kit and details of any modifications	E	Page6-7line147-154
Source of additional reagents used	D	Not Applicable
Details of DNase or RNAse treatment	E	Page6-7line147-154
Contamination assessment (DNA or RNA)	E	Page6-7line147-154
Nucleic acid quantification	E	Page6-7line147-154
Instrument and method	E	Page6-7line147-154
Purity (A260/A280)	D	Not Applicable
Yield	D	Not Applicable
RNA integrity method/instrument	E	Page6-7line147-154
RIN/RQI or Cq of 3' and 5' transcripts	E	Page6-7line147-154
Electrophoresis traces	D	Not Applicable
Inhibition testing (Cq dilutions, spike or other)	E	Page6-7line147-154
REVERSE TRANSCRIPTION
Complete reaction conditions	E	Page6-7line147-154
Amount of RNA and reaction volume	E	Page6-7line147-154
Priming oligonucleotide (if using GSP) and concentration	E	Page6-7line147-154
Reverse transcriptase and concentration	E	Page6-7line147-154
Temperature and time	E	Page6-7line147-154
Manufacturer of reagents and catalogue numbers	D	Not Applicable
Cqs with and without RT	D*	Not Applicable
Storage conditions of cDNA	D	Not Applicable
qPCR TARGET INFORMATION
If multiplex, efficiency and LOD of each assay.	E	Page6-7line147-154
Sequence accession number	E	Page6-7line147-154
Location of amplicon	D	Not Applicable
Amplicon length	E	Page6-7line147-154
In silico specificity screen (BLAST, etc)	E	Page6-7line147-154
Pseudogenes, retropseudogenes or other homologs?	D	Not Applicable
Sequence alignment	D	Not Applicable
Secondary structure analysis of amplicon	D	Not Applicable
Location of each primer by exon or intron (if applicable)	E	Page6-7line147-154
What splice variants are targeted?	E	Page6-7line147-154
qPCR OLIGONUCLEOTIDES
Primer sequences	E	Page6-7line147-154
RTPrimerDB Identification Number	D	Not Applicable
Probe sequences	D**	Not Applicable
Location and identity of any modifications	E	Page6-7line147-154
Manufacturer of oligonucleotides	D	Not Applicable
Purification method	D	Not Applicable
qPCR PROTOCOL
Complete reaction conditions	E	Page6-7line147-154
Reaction volume and amount of cDNA/DNA	E	Page6-7line147-154
Primer, (probe), Mg++ and dNTP concentrations	E	Page6-7line147-154
Polymerase identity and concentration	E	Page6-7line147-154
Buffer/kit identity and manufacturer	E	Page6-7line147-154
Exact chemical constitution of the buffer	D	Not Applicable
Additives (SYBR Green I, DMSO, etc.)	E	Page6-7line147-154
Manufacturer of plates/tubes and catalog number	D	Not Applicable
Complete thermocycling parameters	E	Page6-7line147-154
Reaction setup (manual/robotic)	D	Not Applicable
Manufacturer of qPCR instrument	E	Page6-7line147-154
qPCR VALIDATION
Evidence of optimisation (from gradients)	D	Not Applicable
Specificity (gel, sequence, melt, or digest)	E	Page6-7line147-154
For SYBR Green I, Cq of the NTC	E	Page6-7line147-154
Standard curves with slope and y-intercept	E	Page6-7line147-154
PCR efficiency calculated from slope	E	Page6-7line147-154
Confidence interval for PCR efficiency or standard error	D	Not Applicable
r2 of standard curve	E	Page6-7line147-154
Linear dynamic range	E	Page6-7line147-154
Cq variation at lower limit	E	Page6-7line147-154
Confidence intervals throughout range	D	Not Applicable
Evidence for limit of detection	E	Page6-7line147-154
If multiplex, efficiency and LOD of each assay.	E	Page6-7line147-154
DATA ANALYSIS
qPCR analysis program (source, version)	E	Page6-7line147-154
Cq method determination	E	Page6-7line147-154
Outlier identification and disposition	E	Page6-7line147-154
Results of NTCs	E	Page6-7line147-154
Justification of number and choice of reference genes	E	Page6-7line147-154
Description of normalisation method	E	Page6-7line147-154
Number and concordance of biological replicates	D	Not Applicable
Number and stage (RT or qPCR) of technical replicates	E	Page6-7line147-154
Repeatability (intra-assay variation)	E	Page6-7line147-154
Reproducibility (inter-assay variation, %CV)	D	Not Applicable
Power analysis	D	Not Applicable
Statistical methods for result significance	E	Page6-7line147-154
Software (source, version)	E	Page6-7line147-154
Cq or raw data submission using RDML	D	Not Applicable
Table 1. MIQE checklist for authors, reviewers and editors. All essential information (E) must be submitted with the manuscript. Desirable
information (D) should be submitted if available. If using primers obtained from RTPrimerDB, information on qPCR target, oligonucleotides,
protocols and validation is available from that source.
*: Assessing the absence of DNA using a no RT assay is essential when first extracting RNA. Once the sample has been validated as
RDNA-free, inclusion of a no-RT control is desirable, but no longer essential.
**: Disclosure of the probe sequence is highly desirable and strongly encouraged. However, since not all commercial pre-designed assay
vendors provide this information, it cannot be an essential requirement. Use of such assays is advised against.
